# Supplementary material
Source: PubMed Central journal article supplement (PMC2660612)
Supplement: tpc.108.061549_1.pdf [file tpc.108.061549_1.pdf]

**Supplemental Figure 1 Comparison of ABA sensitive phenotypes in *ror1-3*, *fas1-101* and *pol \alpha* mutants.**

(A). Seed germination of *ror1-3* (T-DNA insertion in RPA2A) and *abo4-1* (Columbia accession) on MS or MS medium containing 0.3  $\mu$ M ABA.

(B). Comparison of seedling growth of wild type (C24 accession), *pol \alpha* mutant ( another mutant allele in ICU2 DNA polymerase  $\alpha$ ) and *ror1-1* ( a RPA2A mutation in C24 accession) on MS medium MS medium containing 20  $\mu$ M ABA.

(C) Comparison of seedling growth of wild type, *fas1-101* and *ror1-3* on MS medium containing different concentrations of ABA.

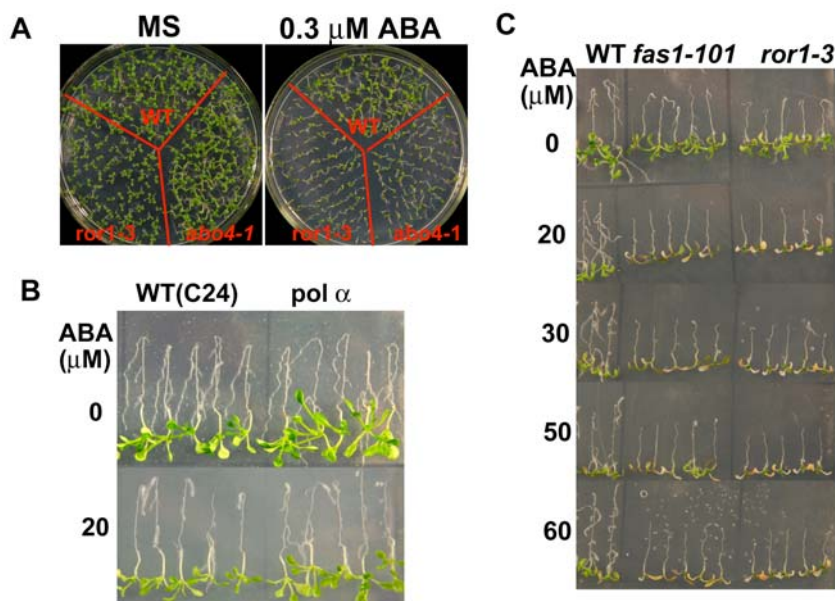

**Supplemental Figure 2. Homologous Recombination patterns in *ror1-3* (1415) and *ror1-3* (1406).**

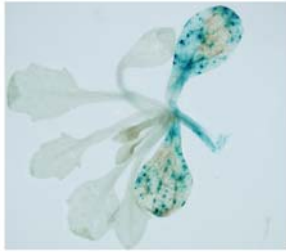

**ror1-3 1415**

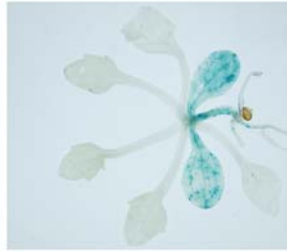

**ror1-3 1406**

**Supplemental Table1 Primers used in this study**

**Supplemental Table 1a. The Primers Used for Real-time PCR in Gene Expression Assay**

| Gene name          | Primers                                      | Annealing temperature(°C) |
|--------------------|----------------------------------------------|---------------------------|
| <i>BRCA1</i>       | Forward: 5'-CCATGTATTTTGAATGCGTG-3'          | 59                        |
|                    | Reverse: 5'-TGIGGAGCACCTCGAATCTCT-3'         |                           |
| <i>RAD51</i>       | Forward: 5'-CGAGGAAGGATCTCTTGCAAG-3'         | 59                        |
|                    | Reverse: 5'-GCACTAGTGAACCCAGAGG-3'           |                           |
| <i>GRI</i>         | Forward: 5'-GAAGGAGCAGACAAAGTGAG-3'          | 60                        |
|                    | Reverse: 5'-GGTGAGATGGAAGTGATAGG-3'          |                           |
| <i>MRE11</i>       | Forward: 5'-ACACTTCGAGTACTTGTGCAACTG-3'      | 60                        |
|                    | Reverse: 5'-ATCACCTCCGAGGAGTAAGAAGTC-3'      |                           |
| <i>MSH2</i>        | Forward: 5'-CCATGTCAGCGCTCACATTGAC-3'        | 58                        |
|                    | Reverse: 5'-AGGAGGGAGAGAAATCTTCCAGC-3'       |                           |
| <i>MSH6</i>        | Forward: 5'-GCCCTGAAGAGCATTTCACAGAG-3'       | 59                        |
|                    | Reverse: 5'-TGGAACACCATCAGATGTAGAACCAG-3'    |                           |
| <i>Ku70</i>        | Forward: 5'-CGAGCTTCGTGAAACCAGAGATG-3'       | 61                        |
|                    | Reverse: 5'-CTTCTTCATCAGGGTCATCGCC-3'        |                           |
| <i>Histone H4b</i> | Forward: 5'-CCTTTAGAAAATGTCAGGTCGIGG-3'      | 60                        |
|                    | Reverse: 5'-TAACACCACCTCTACGAGCC-3'          |                           |
| <i>CycB1;1</i>     | Forward: 5'-GATCAATCATCGTCCTCGTACACG-3'      | 60                        |
|                    | Reverse: 5'-CACGICTACTACCTTTGGTTTCCC-3'      |                           |
| <i>CDC2A</i>       | Forward: 5'-CCTGTCAGGACATTTACTCATGAG-3'      | 60                        |
|                    | Reverse: 5'-GCTTTTGGCTGATCATCTCAGC-3'        |                           |
| <i>CYCA2;1</i>     | Forward: 5'-GTTGCAGAGCTTGAACAAAGACC-3'       | 60                        |
|                    | Reverse: 5'-CCAACTTGTACTCTTICAGAGACCTC-3'    |                           |
| <i>TSI</i>         | Forward: 5'-TGGTTCACCAGATAAGCTCAGTGCCCTC-3'  | 61                        |
|                    | Reverse: 5'-GGGAATGGTATCAGATCCTAACAGTGTGG-3' |                           |
| <i>FLC</i>         | Forward: 5'-TTGAACTTGTGGATAGCAAGCTT-3'       | 59                        |
|                    | Reverse: 5'-CGGICTTCTTGGCTCTAGTCA-3'         |                           |
| <i>FT</i>          | Forward: 5'-GAACAACCTTTGGCAATGAGATT-3'       | 59                        |
|                    | Reverse: 5'-CACCTGGTGCATACACTGTT-3'          |                           |
| <i>AP1</i>         | Forward: 5'-CGACGTCAATACAAACTGGTCGAT-3'      | 60                        |
|                    | Reverse: 5'-CTTTAGGGCTCATTTGCTTGCA-3'        |                           |
| <i>18S-RNA</i>     | Forward: 5'-CGGCTACCACATCCAAGGAA-3'          | 58-61                     |
|                    | Reverse: 5'-TGICTACTACCTCCCCGTGTC-3'         |                           |

**Supplemental Table 1b. The Primers Used for Mapping-based cloning**

| BAC clone Name | Primers                                                                                                                                                                        |
|----------------|--------------------------------------------------------------------------------------------------------------------------------------------------------------------------------|
| F24B9          | Forward: 5'-TCTGCTGTTTCACCAGCCTCC-3'<br>Reverse: 5'-TTGTTACCCGACTGGGTTGC-3'                                                                                                    |
| T23G18         | Forward: 5'-CCGATGAGTGGCCAAGTGTTACG-3'<br>Reverse: 5'-GTAGATCGAGGACAGAGGAGCC-3'                                                                                                |
| T27G7          | Forward-1: 5'-ACTTGATTTGCGCTTCCGTGG-3'<br>Reverse-1: 5'-GCACATGTACCTTGTTGTCTCTGC -3'<br>Forward-2: 5'-GCCCATATTCGTTTGGGCTGTTAG-3'<br>Reverse-2: 5'-CCTTTGAGGCTTTCAGTTTGACCC-3' |

**Supplemental Table 1c. The Primers Used for Amplifying Probes in RNA Gel Blot Analysis**

| Gene Name    | Primers                                                                                    |
|--------------|--------------------------------------------------------------------------------------------|
| <i>RD29A</i> | Forward: 5'-GACGAGTCAGGAGCTGAGCTG-3'<br>Reverse: 5'-CGATGCTGCCTTCTCGGTAGAG-3'              |
| <i>COR47</i> | Forward: 5'-GAAGCTCCCAGGACACCACGAC-3'<br>Reverse: 5'-CAGCGAATGTCCCCTCCAC-3'                |
| <i>LUC</i>   | Forward: 5'-GAAAGGCCCGCGCCATTCTATCC-3'<br>Reverse: 5'-CGTTCGCGGGCGCAACTGCAACTC-3'          |
| <i>TSI</i>   | Forward: 5'-CACTCTTGTTAATCCAAGTAGCTGACTCTCC-3'<br>Reverse: 5'-GGGCTTTTGCCCATCTTCAATAGCT-3' |
| <i>NPTII</i> | Forward: 5'-GTCAAGACCGACCTGTCCGGTG-3'<br>Reverse: 5'-GTCCTGATAGCGGTCCGCCACA -3'            |

**Supplemental Table 1d. The Primers Used for Real-time PCR in CHIP Assay**

| Gene Name     | Primers                                                                                        |
|---------------|------------------------------------------------------------------------------------------------|
| <i>FT</i>     | Forward: 5'-CTGGCGGTACCCTACTTTTT-3'<br>Reverse: 5'-ATCTCCCACTTGGTAGCCACT-3'                    |
| <i>FLC-P3</i> | Forward: 5'-CGAGCACGCATCAGATCG-3'<br>Reverse: 5'-GGCGGATCTCTIGTTGTTTCTC-3'                     |
| <i>FLC-P5</i> | Forward: 5'-GCTGGACCTAACTAGGGGTGAAC-3'<br>Reverse: 5'-CCTCTTTGGTACGGATCTATAATGAATC-3'          |
| <i>ACTIN</i>  | Forward: 5'-CGTTTCGCTTTCCTTAGTGTTAGCT-3'<br>Reverse: 5'-AGCGAACGGATCTAGAGACTCACCTTG-3'         |
| <i>TA3</i>    | Forward: 5'-GCTAAAACGGATTTCTCATGTAGAGGAT-3'<br>Reverse: 5'-TACTTATCCCACTCTAATCTCTCCATAAACAC-3' |

## Reference

**Cao, Y., Dai, Y., Cui, S., and Ma, L.** (2008). Histone H2B monoubiquitination in the chromatin of FLOWERING LOCUS C regulates flowering time in Arabidopsis. *Plant Cell* **20**, 2586-2602.
